# Supplementary material for: Original biobased nonisocyanate polyurethanes: solvent- and catalyst-free synthesis, thermal properties and rheological behaviour
Source: Royal Society of Chemistry journal article supplement (doi:10.1039/c4ra09794g), 2014-01-01
Supplement: c4ra09794g1.pdf [file c4ra09794g1.pdf]

## **Electronic Supplementary Information (ESI)**

**Original biobased nonisocyanate polyurethanes: Solvent- and catalyst-free synthesis, thermal properties and rheological behaviour**

Camille Carré, Lara Bonnet, Luc Avérous\*

BioTeam/ICPEES-ECPM, UMR 7515, Université de Strasbourg,  
25 rue Becquerel, 67087 Strasbourg Cedex 2, France

Correspondence to: Prof. Luc Avérous (E-mail: [luc.averous@unistra.fr](mailto:luc.averous@unistra.fr))

## Characterization of sebacic bis(cyclo)carbonate (SB BisCC)

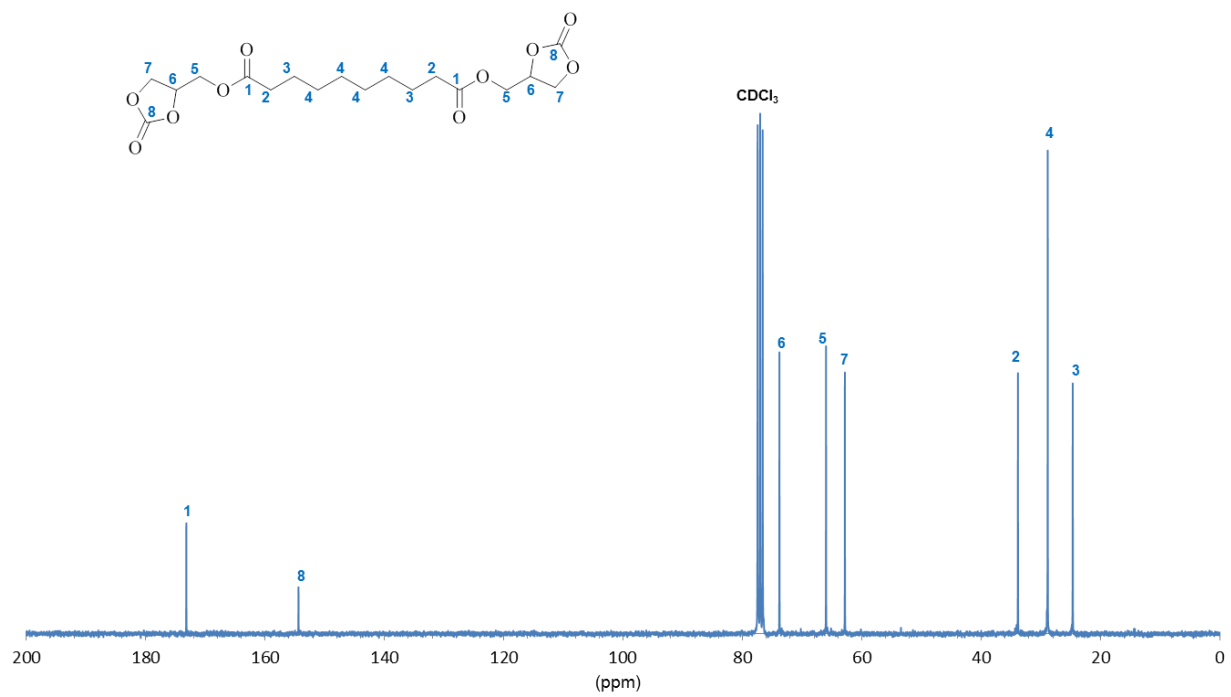

**Fig. S1** <sup>13</sup>C-NMR spectrum of SB BisCC.

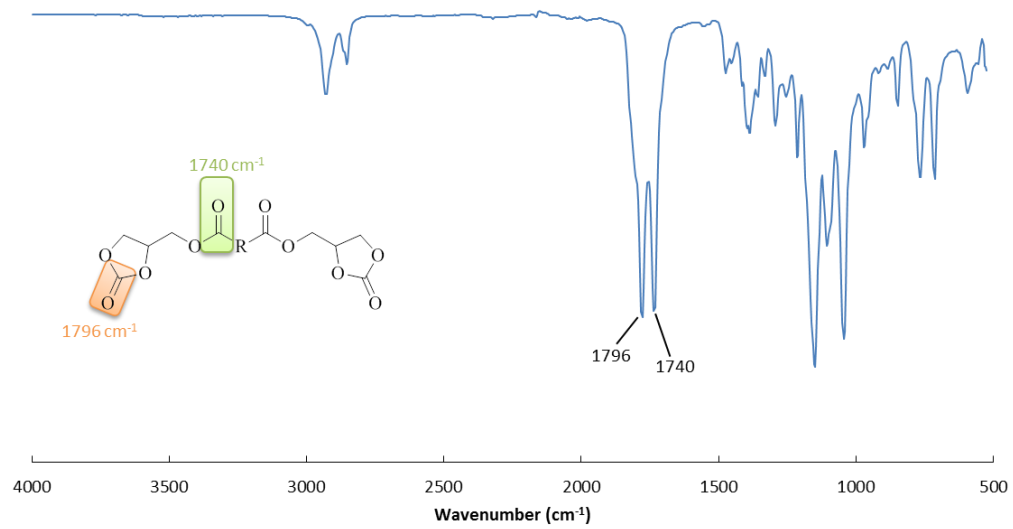

**Fig. S2** FTIR spectra of SB BisCC.

## Characterization of NonIsocyanate PolyUrethane (*NIPU-fn=2.0*)

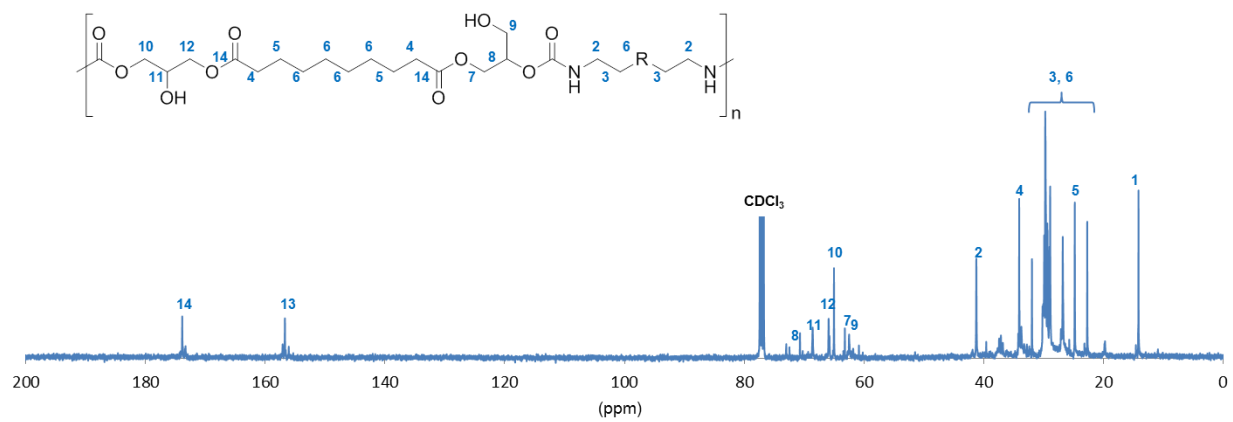

**Fig. S3** <sup>13</sup>C-NMR spectrum of *NIPU-fn=2.0*.

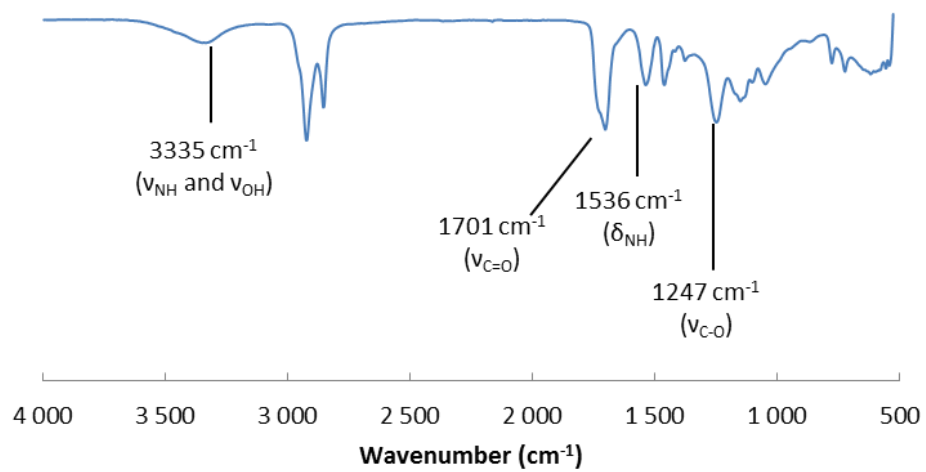

**Fig. S4** FTIR spectra of *NIPU-fn=2.0*.
